# Supplementary material
Source: PubMed Central journal article supplement (PMC151466)
Supplement: plntcell_14_8_1801__1.pdf [file plntcell_14_8_1801__1.pdf]

**Table 1.** *Lhcbm* Genes from *Chlamydomonas reinhardtii*

|                | cDNA Accession Number | Genomic Accession Number | Alternate Names  | References                             |
|----------------|-----------------------|--------------------------|------------------|----------------------------------------|
| <i>Lhcbm1</i>  | AB051210              | AF95473, AB051206        | <i>LhcII-4</i>   | Teramoto et al., 2001; this manuscript |
| <i>Lhcbm2</i>  | AB051205              | AB051205                 | <i>LhcII-3</i>   | Teramoto et al., 2001                  |
| <i>Lhcbm3</i>  | AB051208              | AB051204                 | <i>LhcII-1.3</i> | Teramoto et al., 2001                  |
| <i>Lhcbm4</i>  | AF104630              | -                        | <i>Lhcb2</i>     | Somanchi et al., 1998                  |
| <i>Lhcbm5</i>  | AF104631              | -                        | <i>Lhcb3</i>     | Somanchi et al., 1998                  |
| <i>Lhcbm6</i>  | AF95472               | M204072.1                | <i>CabII-1</i>   | Imbault et al., 1988; this manuscript  |
| <i>Lhcbm7</i>  | AF479779              | -                        | -                | this manuscript                        |
| <i>Lhcbm8</i>  | AF330793              | -                        | <i>CabII-2</i>   | Kruse, direct submission               |
| <i>Lhcbm9</i>  | AF479778              | -                        | -                | this manuscript                        |
| <i>Lhcbm10</i> | AF479777              | -                        | -                | this manuscript                        |
